# Supplementary material for: Fabrication of Low-Fouling Surfaces on Alkyne-Functionalized Poly-(p-xylylenes) Using Click Chemistry
Source: MDPI journal article supplement (doi:10.3390/polym14020225), 2022-01-06

# Supplementary Materials

Figure S1

The  $^1\text{H}$  NMR spectrum of acryloyl 4-azobenzene

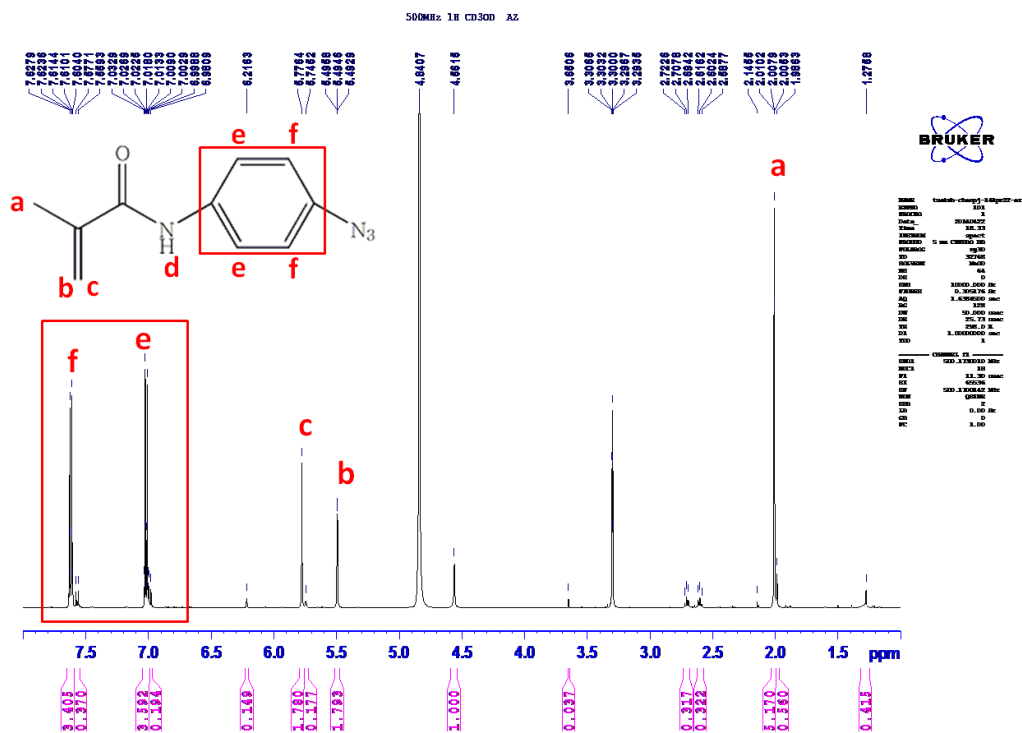

Figure S2 The  $^1\text{H}$  NMR spectra of p(SBMA) and p(SBMA-co-AzMA)

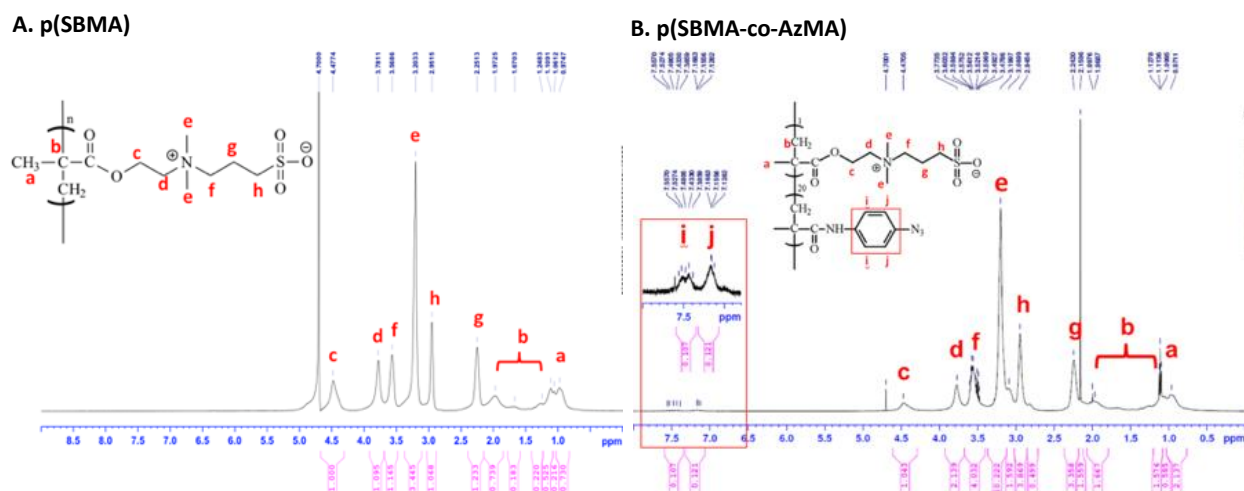

Figure S3 The  $^1\text{H}$  NMR spectrum of poly(PEGMA-co-AzMA)

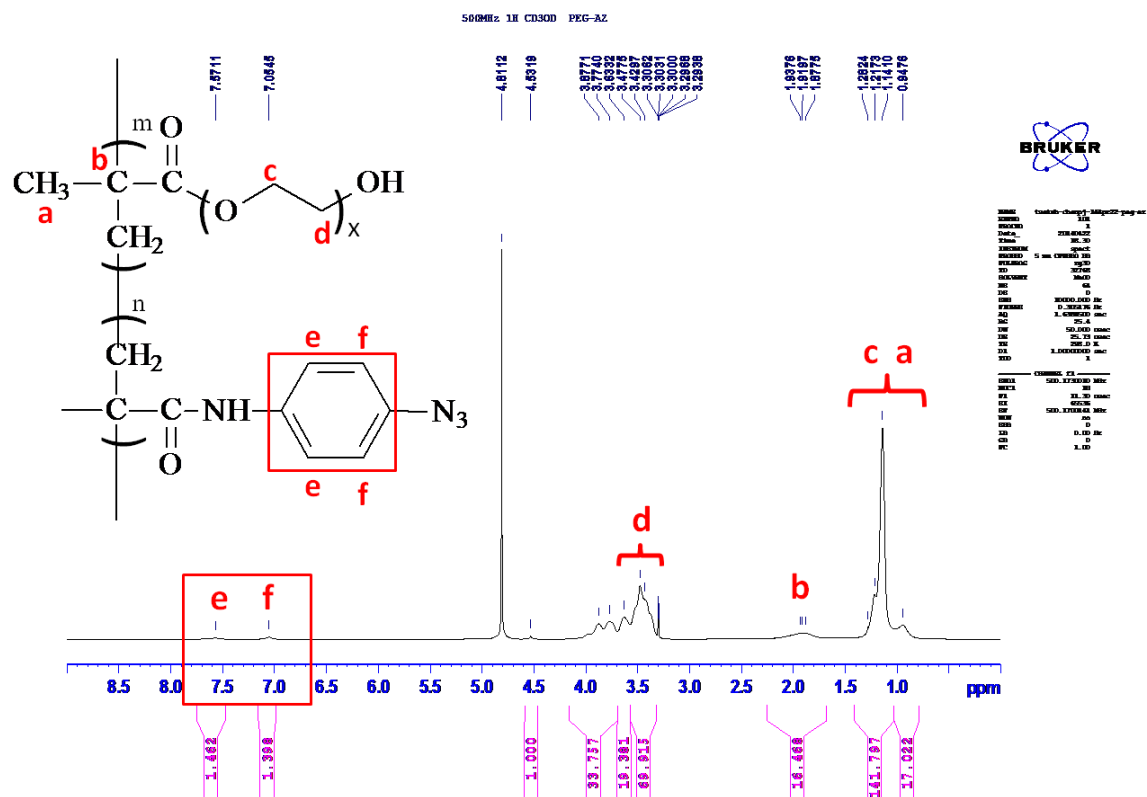

Figure S4 The  $^1\text{H}$  NMR spectrum of poly(PNIPAAm-co-Az)

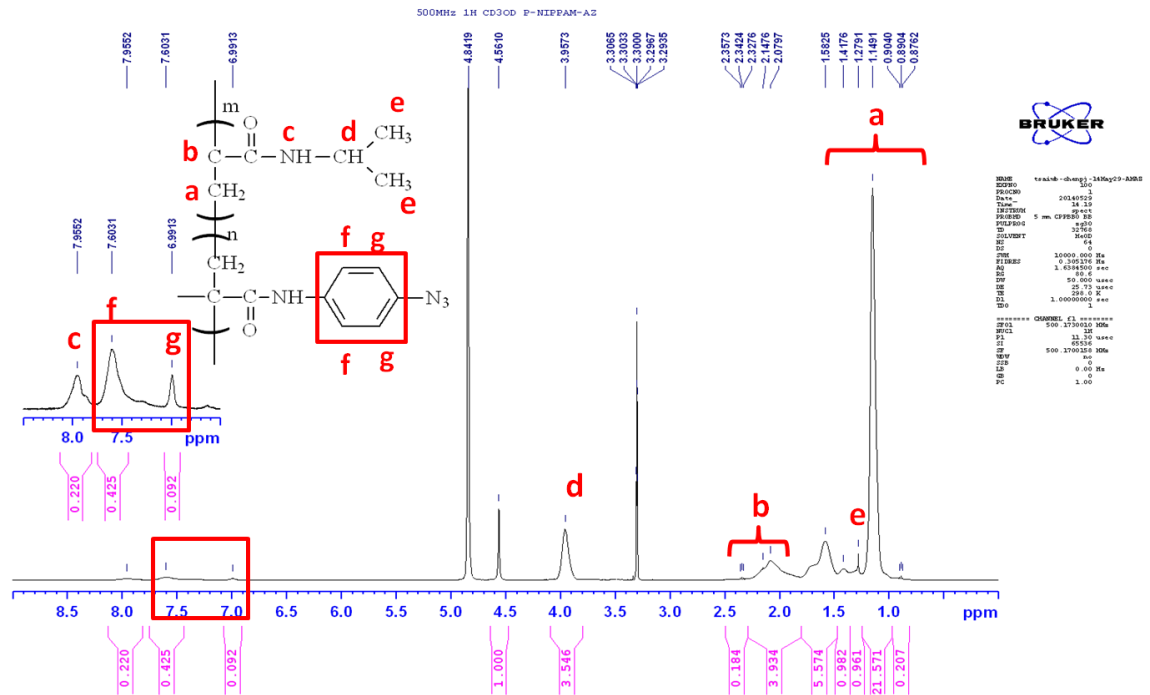

Supplement: s1 [file s1]
